# Supplementary material for: Solution concentration controlled self-assembling structure with host–guest recognition at the liquid–solid interface
Source: Royal Society of Chemistry journal article supplement (doi:10.1039/c5cp04065e), 2015-01-01
Supplement: c5cp04065e1.pdf [file c5cp04065e1.pdf]

SUPPORTING INFORMATION

Solution concentration controlled self-assembling structure with host-guest recognition at the liquid-solid interface

*Siqi Zhang,<sup>ab</sup> Junyong Zhang,<sup>c</sup> Ke Deng,<sup>\*b</sup> Jingli Xie,<sup>\*c</sup> WuBiao Duan,<sup>\*a</sup> and  
QingDao Zeng<sup>\*b</sup>*

<sup>a</sup>Department of Chemistry, School of Science, Beijing Jiaotong University,  
Beijing, 100044, China. E-mail: wbduan@bjtu.edu.cn

<sup>b</sup>CAS Key Laboratory of Standardization and Measurement for Nanotechnology,  
National Center for Nanoscience and Technology, Beijing, 100190, China. E-mail:  
zengqd@nanoctr.cn; kdeng@nanoctr.cn

<sup>c</sup>College of Biological Chemical Science and Engineering, Jiaying University,  
Jiaying, 314001, China. E-mail: jlxie@mail.zjxu.edu.cn

**\*Corresponding authors**

---

## LIST OF CONTENTS

|                                          |    |
|------------------------------------------|----|
| 1. Unit cell of $H_3TTCA$ .....          | S1 |
| 2. Unit cell of $H_3TTCA/COR(I)$ .....   | S2 |
| 3. Unit cell of $H_3TTCA/COR(II)$ .....  | S3 |
| 4. Unit cell of $H_3TTCA/COR(III)$ ..... | S4 |

## 1. Unit cell of H<sub>3</sub>TTCA

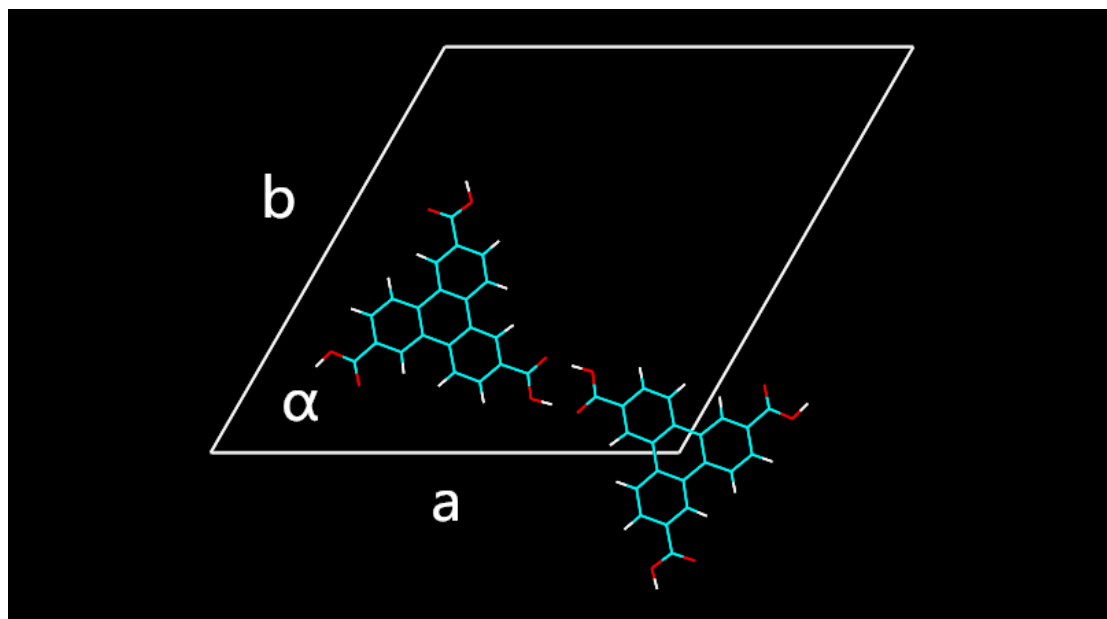

**Figure S1.** The calculated structure in the unit cell of H<sub>3</sub>TTCA assembly. The calculated unit cell parameters were:  $a = b = 2.39$  nm,  $\alpha = 60.0^\circ$ .

## 2. Unit cell of H<sub>3</sub>TTCA/COR(I)

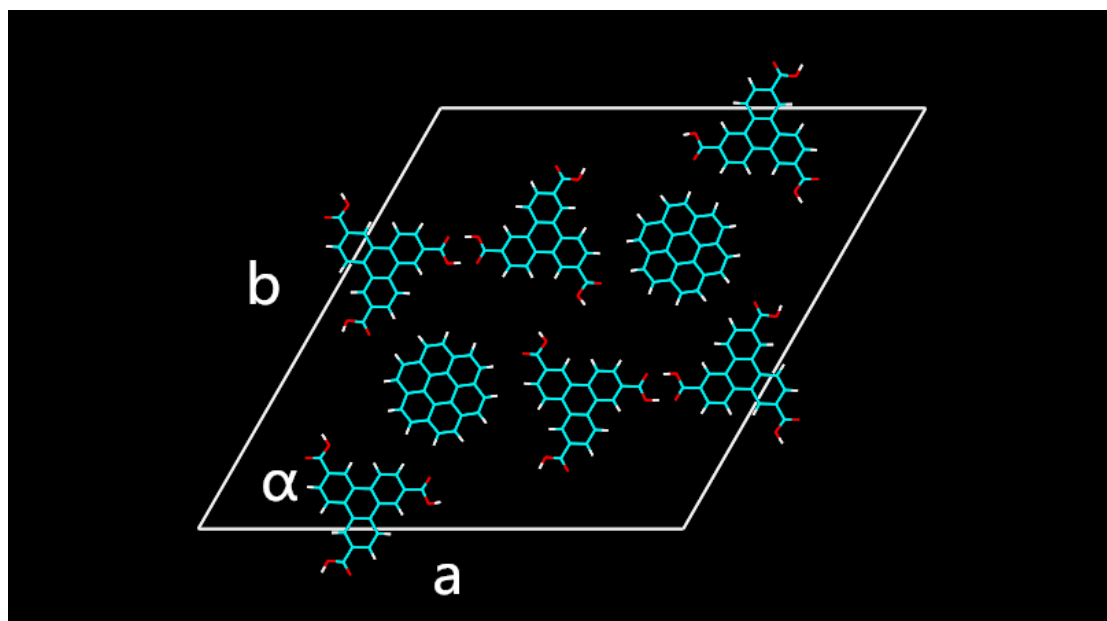

**Figure S2.** The calculated structure in the unit cell of H<sub>3</sub>TTCA/COR(I) assembly. The calculated unit cell parameters were:  $a = b = 4.05$  nm,  $\alpha = 60.0^\circ$ .

### 3. Unit cell of H<sub>3</sub>TTCA/COR(II)

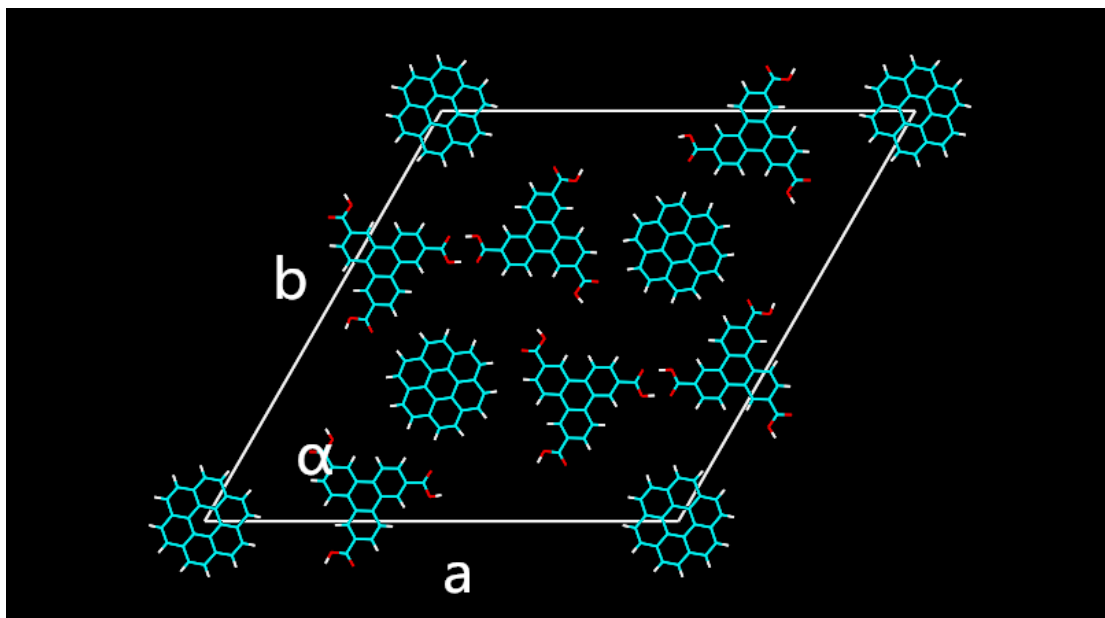

**Figure S3.** The calculated structure in the unit cell of H<sub>3</sub>TTCA/COR(II) assembly. The calculated unit cell parameters were:  $a = b = 4.05$  nm,  $\alpha = 60.0^\circ$ .

### 4. Unit cell of H<sub>3</sub>TTCA/COR(III)

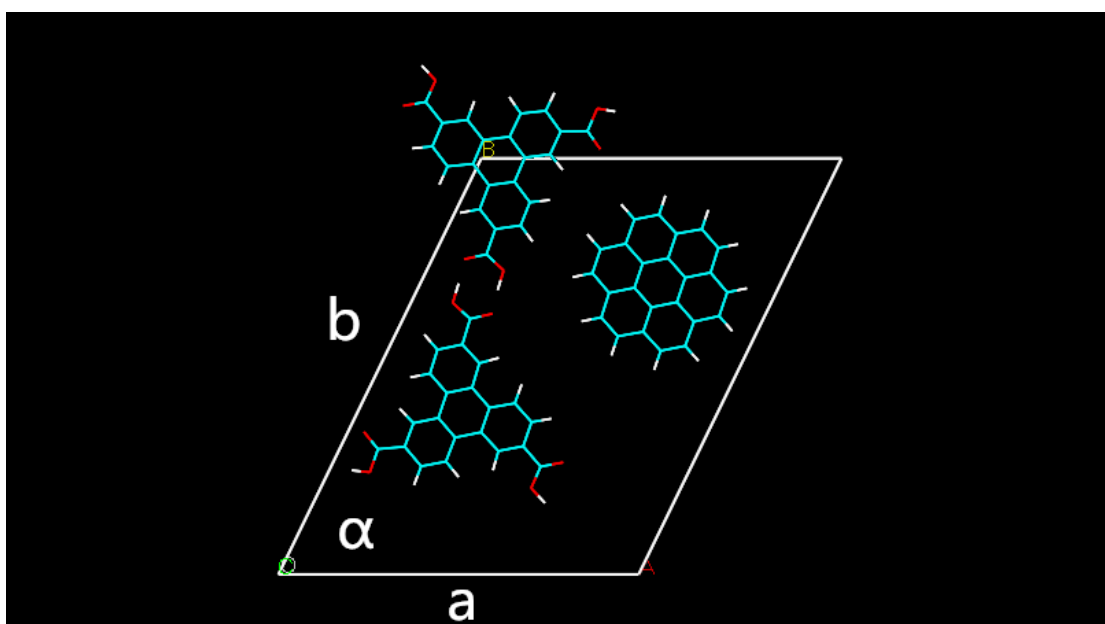

**Figure S4.** The calculated structure in the unit cell of H<sub>3</sub>TTCA/COR(III) assembly. The calculated

---

unit cell parameters were:  $a = 1.97$ ,  $b = 2.55$  nm,  $\alpha = 64.0^\circ$ .
